# Supplementary material
Source: PubMed Central journal article supplement (PMC8996344)
Supplement: NIHMS1779511-supplement-Supplemental_information.pdf [file NIHMS1779511-supplement-Supplemental_information.pdf]

---

**Supplementary information**

---

**Disrupting Roquin-1 interaction with  
Regnase-1 induces autoimmunity and  
enhances antitumor responses**

---

In the format provided by the  
authors and unedited

| Genotype                                                                              |                                | Roquin-1/2<br>DKO <sup>T</sup>             | Regnase-1<br>KO <sup>T</sup>                               | Roquin-1/2 Regnase-1<br>TKO <sup>T</sup>   |       |
|---------------------------------------------------------------------------------------|--------------------------------|--------------------------------------------|------------------------------------------------------------|--------------------------------------------|-------|
| <i>Cd4</i> -Cre deletion (homeostasis)                                                | <b>CD4<sup>+</sup> T cells</b> | activation                                 | EM                                                         | EM/CM                                      | EM/CM |
|                                                                                       |                                | T <sub>FH</sub> cells (%)                  | ++                                                         | +                                          | +++   |
|                                                                                       |                                | Treg cells (%)                             | +++                                                        | +++                                        | ++    |
|                                                                                       |                                | glycolytic activity                        | ++                                                         | ++                                         | +++   |
|                                                                                       |                                | mitochondrial respiration                  | +                                                          | ++                                         | +++   |
|                                                                                       | <b>GC B cells</b>              |                                            | +                                                          | ++                                         | +++   |
|                                                                                       | <b>ANAs</b>                    |                                            | unchanged                                                  | +++                                        | ++    |
|                                                                                       | <b>CD8<sup>+</sup> T cells</b> | activation                                 | EM                                                         | EM/CM                                      | EM    |
|                                                                                       |                                | glycolytic activity                        | ++                                                         | ++                                         | +++   |
|                                                                                       |                                | mitochondrial respiration                  | +                                                          | ++                                         | (++)  |
|                                                                                       |                                | ICOS                                       | +                                                          | ++                                         | ++    |
|                                                                                       |                                | CD38                                       | ++                                                         | +                                          | ++    |
|                                                                                       |                                | IFN-γ <sup>+</sup> TNF <sup>+</sup>        | +++                                                        | +++                                        | +++   |
|                                                                                       |                                | IL-2                                       | unchanged                                                  | +++                                        | +     |
|                                                                                       |                                | Granzyme B                                 | +++                                                        | +                                          | ++    |
|                                                                                       |                                | KLRG1                                      | +++                                                        | +                                          | +     |
|                                                                                       |                                | BATF                                       | +                                                          | +                                          | +     |
|                                                                                       |                                | TCF-1                                      | ↓↓↓                                                        | ↓                                          | ↓↓↓   |
|                                                                                       |                                | CXCR5                                      | unchanged                                                  | +                                          | +     |
|                                                                                       |                                | Tim-3                                      | ++                                                         | +                                          | +     |
|                                                                                       |                                | PD-1                                       | ++                                                         | +                                          | +     |
|                                                                                       |                                | CTLA-4                                     | +                                                          | +                                          | ++    |
|                                                                                       | in vitro killing               | +++                                        | +                                                          | n.d.                                       |       |
| adoptive transfer of CD4 <sup>+</sup> T cells; acute deletion ( <i>Cd4</i> -Cre-ERT2) |                                | proliferation but no long-term persistence | proliferation and long-term persistence; induction of ANAs | proliferation but no long-term persistence |       |
| adoptive transfer of CD8 <sup>+</sup> OTI T cells in the B16-OVA melanoma model       |                                | enhanced anti-tumor response               | enhanced anti-tumor response                               | n.d.                                       |       |

**Supplementary Table 1:** Summary of Roquin and Regnase knock out phenotypes in different cell types and experimental settings. n.d.: not determined, EM: effector memory, CM: central memory, GC: germinal center, ANA: anti-nuclear antibody.

| <b>Name</b>        | <b>Sequence (5' - 3')</b> | <b>UPL probe</b> |
|--------------------|---------------------------|------------------|
| <i>Icos</i> for    | AACCTTAGTGGAGGATATTTGCAT  | 33               |
| <i>Icos</i> rev    | CTACGGGTAGCCAGAGCTTC      | 33               |
| <i>Tnfrsf4</i> for | GCTTGGAGTTGACTGTGTTCC     | 79               |
| <i>Tnfrsf4</i> rev | GGGTCTGCTTTCCAGATAAGG     | 79               |
| <i>Ywhaz</i> for   | CGCTAATAATGCAGTTACTGAGAGA | 2                |
| <i>Ywhaz</i> rev   | TTGGAAGGCCGGTTAATTTT      | 2                |
| <i>Zc3h12a</i> for | GAAGCAATGTGGCCATGAG       | 76               |
| <i>Zc3h12a</i> rev | CCTCGCTCCAGAAACCAG        | 76               |

**Supplementary Table 2:** DNA oligonucleotides and probes from the Universal Probe Library (UPL) system (Roche) used for RT-qPCR analyses.
